# Supplementary material for: Dimeric transport mechanism of human vitamin C transporter SVCT1
Source: PubMed Central journal article supplement (PMC11219872; doi:10.1038/s41467-024-49899-2), 2024-07-02
Supplement: 41467_2024_49899_MOESM3_ESM.pdf [file 41467_2024_49899_MOESM3_ESM.pdf]

## **Description of Additional Supplementary Files:**

**Supplementary Movie 1:** Structural transitions of hSVCT1 in the transport cycle.
